# Supplementary material for: The Effect of Dosing Regimens on the Antimalarial Efficacy of Dihydroartemisinin-Piperaquine: A Pooled Analysis of Individual Patient Data
Source: PubMed Central journal article supplement (PMC3848996; doi:10.1371/journal.pmed.1001564), 2013-12-03
Supplement: pmed.1001564.s002.pdf [file pmed.1001564.s002.pdf]

## Study sites for clinical trials with Dihydroartemesinin-Piperaquine

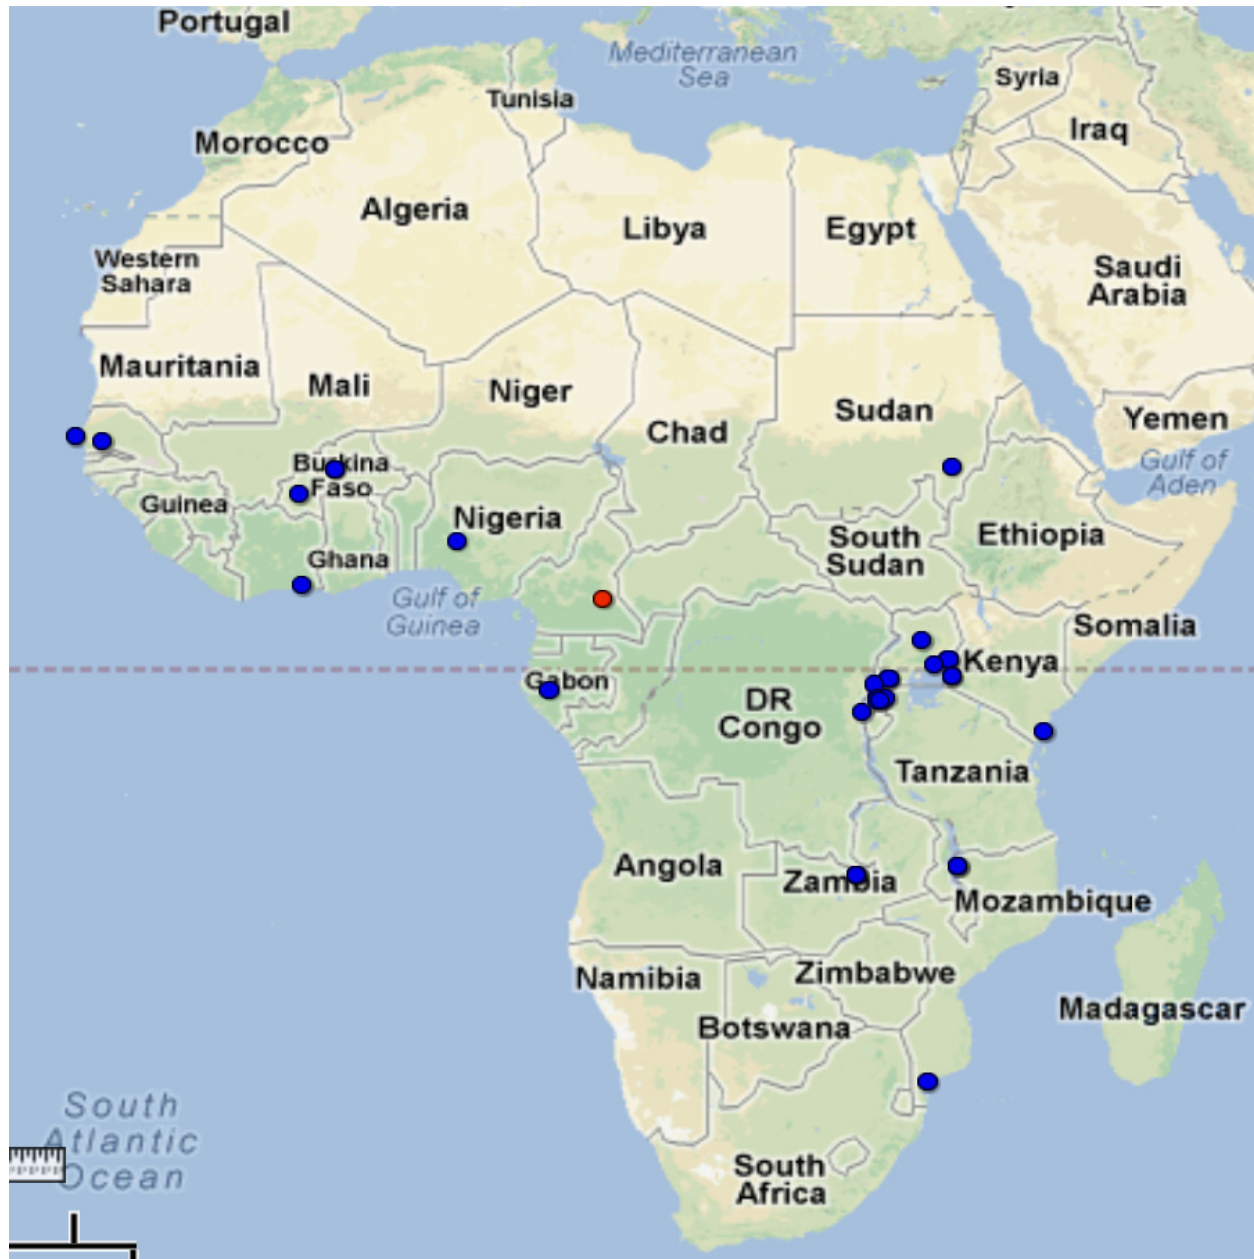

## Study sites for clinical trials with Dihydroartemesinin-Piperaquine

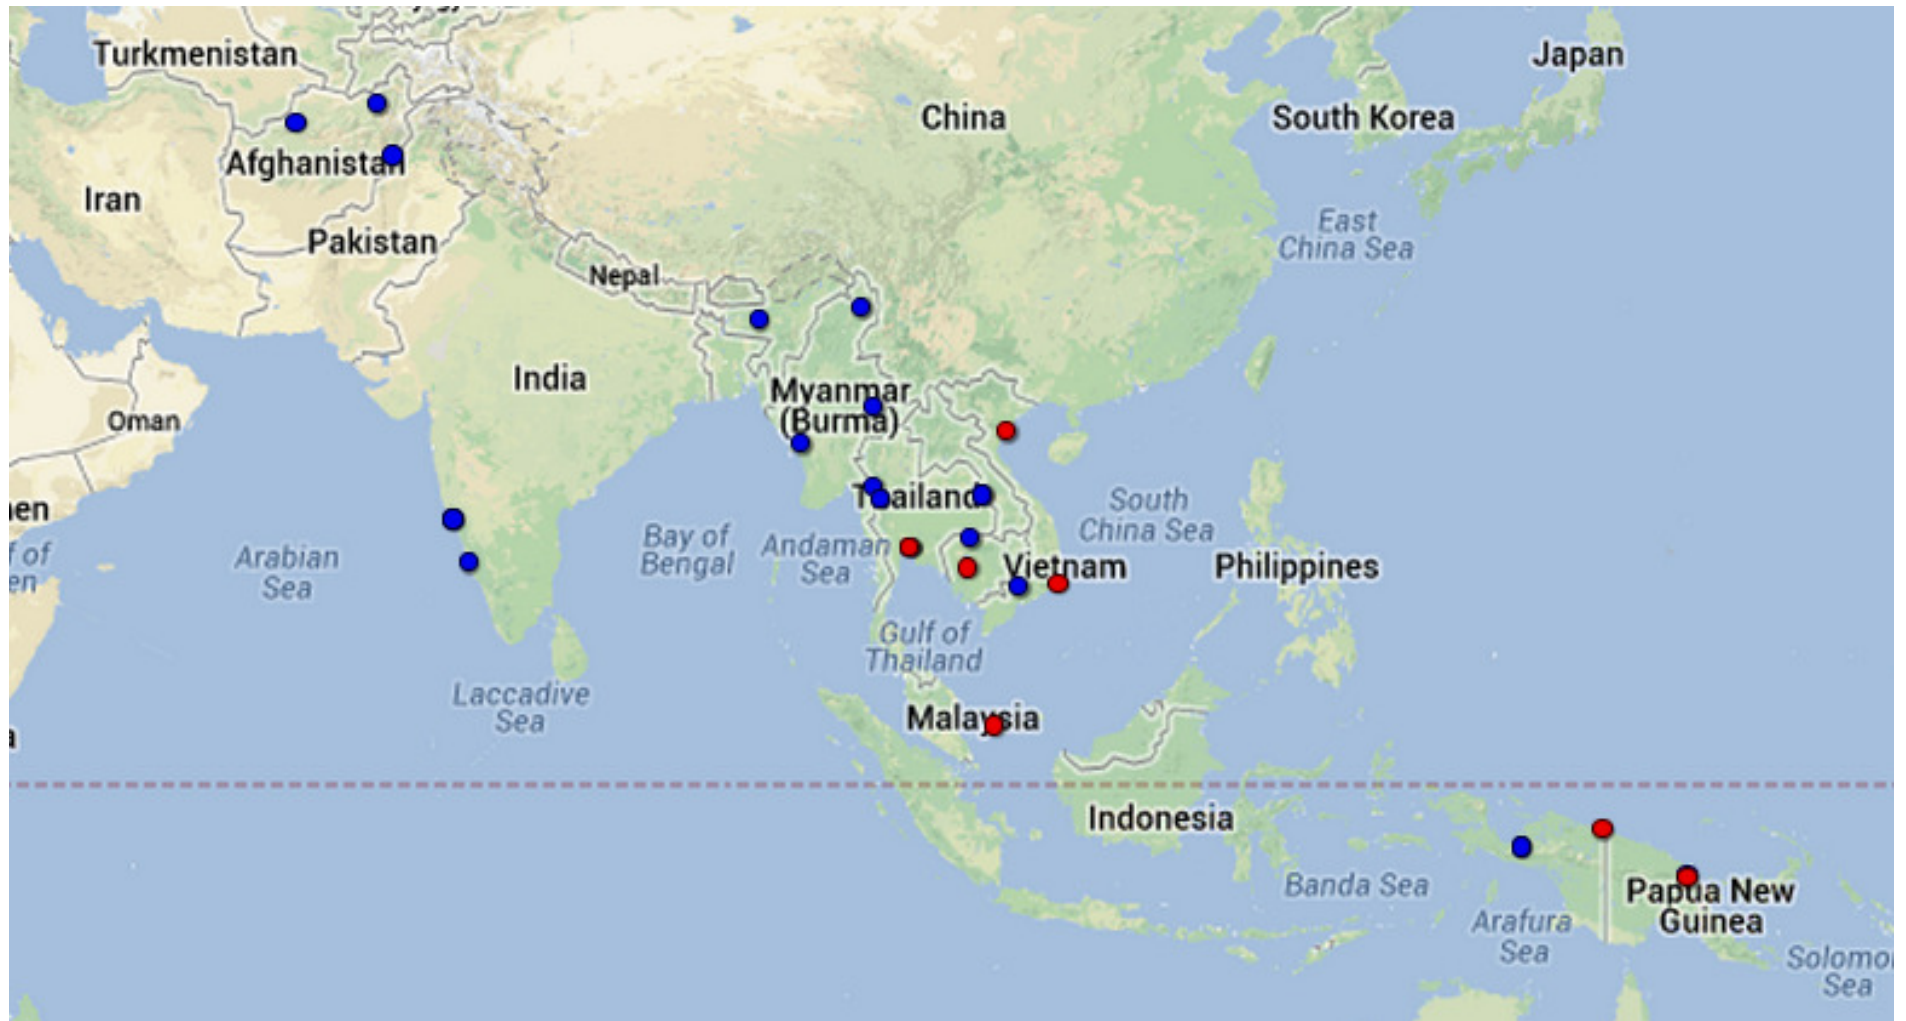

Blue icons represent sites included in the analysis.

Red icons represent sites from publications not included in the analysis

## Study sites for clinical trials with Dihydroartemesinin-Piperaquine

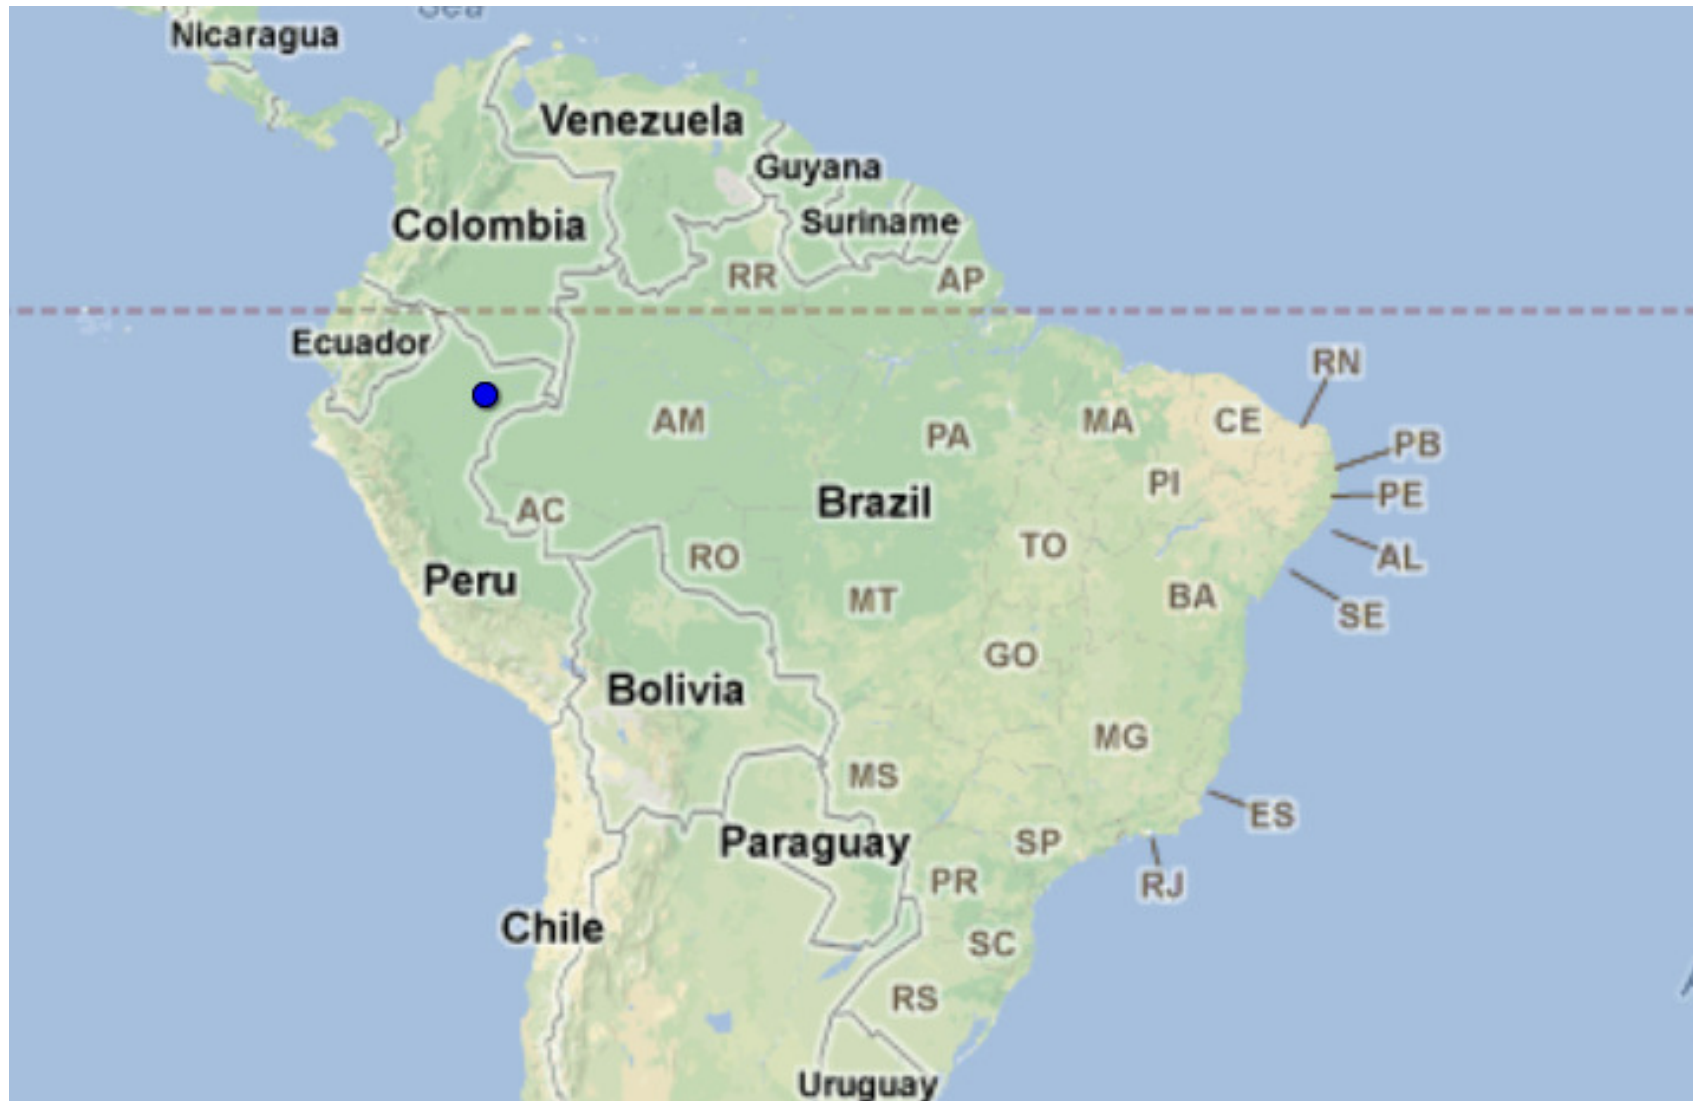

Blue icons represent sites included in the analysis.

Red icons represent sites from publications not included in the analysis
