# Supplementary material for: The Effect of Dosing Regimens on the Antimalarial Efficacy of Dihydroartemisinin-Piperaquine: A Pooled Analysis of Individual Patient Data
Source: PLoS Med. 2013 Dec 3;10(12):e1001564. doi: 10.1371/journal.pmed.1001564 (PMC3848996; doi:10.1371/journal.pmed.1001564)
Supplement: Text S1 — References of all DP clinical trials, their study designs, and dosing schedules. (XLSX) [file pmed.1001564.s001.xlsx]

## Sheet: References
Reference	Author	Year	Title	Journal	Vol	Issue	Pages	Abstract	Accession Number	Region	Country	URL	Pooled Analysis
4ABC Study Group-2011	4ABC Study Group,The Four Artemisinin-Based Combinations Study Group	2011	A Head-to-Head Comparison of Four Artemisinin-Based Combinations for Treating Uncomplicated Malaria in African Children: A Randomized Trial	PLoS medicine	8	11	e1001119	BACKGROUND: Artemisinin-based combination therapies (ACTs) are the mainstay for the management of uncomplicated malaria cases. However, up-to-date data able to assist sub-Saharan African countries formulating appropriate antimalarial drug policies are scarce. METHODS AND FINDINGS: Between 9 July 2007 and 19 June 2009, a randomized, non-inferiority (10% difference threshold in efficacy at day 28) …	22087077	Africa	Multicentred	http://www.plosmedicine.org/article/info:doi/10.1371/journal.pmed.1001119	Included
Adam-2010	Adam, I.;Salah, M. T.;Eltahir, H. G.;Elhassan, A. H.;Elmardi, K. A.;Malik, E. M.	2010	Dihydroartemisinin-piperaquine versus artemether-lumefantrine, in the treatment of uncomplicated Plasmodium falciparum malaria in central Sudan	Annals of tropical medicine and parasitology	104	4	319-26	Artemisinin-based combination therapies (ACT) are now being adopted as first-line treatments against uncomplicated malaria in sub-Saharan Africa. Between December 2009 and February 2010, the efficacies of two ACT - dihydroartemisinin-piperaquine (DHA-P) and artemether-lumefantrine (AL) - in the treatment of uncomplicated Plasmodium falciparum malaria were compared in Sinnar, central Sudan. Overal…	20659392	Africa	Sudan	http://www.ncbi.nlm.nih.gov/pubmed/20659392	Included
Arinaitwe-2009	Arinaitwe, E.;Sandison, T. G.;Wanzira, H.;Kakuru, A.;Homsy, J.;Kalamya, J.;Kamya, M. R.;Vora, N.;Greenhouse, B.;Rosenthal, P. J.;Tappero, J.;Dorsey, G.	2009	Artemether-lumefantrine versus dihydroartemisinin-piperaquine for falciparum malaria: a longitudinal, randomized trial in young Ugandan children	Clinical infectious diseases	49	11	1629-37	BACKGROUND: Artemisinin-based combination therapies are now widely recommended as first-line treatment for uncomplicated malaria. However, which therapies are optimal is a matter of debate. We aimed to compare the short- and longer-term efficacy of 2 leading therapies in a cohort of young Ugandan children. METHODS: A total of 351 children aged 6 weeks to 12 months were enrolled and followed up fo…	19877969	Africa	Uganda	http://cid.oxfordjournals.org/content/49/11/1629.abstract	Included
Ashley-2004	Ashley, E. A.;Krudsood, S.;Phaiphun, L.;Srivilairit, S.;McGready, R.;Leowattana, W.;Hutagalung, R.;Wilairatana, P.;Brockman, A.;Looareesuwan, S.;Nosten, F.;White, N. J.	2004	Randomized, controlled dose-optimization studies of dihydroartemisinin-piperaquine for the treatment of uncomplicated multidrug-resistant falciparum malaria in Thailand	The Journal of infectious diseases	190	10	1773-82	BACKGROUND: Dihydroartemisinin-piperaquine (DP) is a new and relatively inexpensive artemisinin-containing fixed-combination antimalarial treatment. An adult treatment course contained 6.4 mg/kg dihydroartemisinin (DHA), which is >40% lower than the level in most artemisinin-containing combinations. This raised the possibility that the efficacy of the current coformulation may not be optimal in t…	15499533	Asia	Thailand	http://jid.oxfordjournals.org/content/190/10/1773.full	Included
Ashley-2005	Ashley, E. A.;McGready, R.;Hutagalung, R.;Phaiphun, L.;Slight, T.;Proux, S.;Thwai, K. L.;Barends, M.;Looareesuwan, S.;White, N. J.;Nosten, F.	2005	A randomized, controlled study of a simple, once-daily regimen of dihydroartemisinin-piperaquine for the treatment of uncomplicated, multidrug-resistant falciparum malaria	Clinical infectious diseases	41	4	425-32	BACKGROUND: Dihydroartemisinin-piperaquine (DP) is a fixed-combination antimalarial drug increasingly deployed in Southeast Asia. The current regimen involves 4 doses given over 3 days. Simplification of the dose regimen should facilitate treatment adherence and thereby increase effectiveness. METHODS: In a randomized, controlled, 3-arm trial conducted along the northwestern border of Thailand, t…	16028147	Asia	Thailand	http://cid.oxfordjournals.org/content/41/4/425.long	Included
Awab-2010	Awab, G. R.;Pukrittayakamee, S.;Imwong, M.;Dondorp, A. M.;Woodrow, C. J.;Lee, S. J.;Day, N. P.;Singhasivanon, P.;White, N. J.;Kaker, F.	2010	Dihydroartemisinin-piperaquine versus chloroquine to treat vivax malaria in Afghanistan: an open randomized, non-inferiority, trial	Malaria journal	9		105	BACKGROUND: Afghanistan's national guidelines recommend chloroquine for the treatment of Plasmodium vivax infection, the parasite responsible for the majority of its malaria burden. Chloroquine resistance in P. vivax is emerging in Asia. Therapeutic responses across Afghanistan have not been evaluated in detail. METHODS: Between July 2007 and February 2009, an open-label, randomized controlled tr…	20409302	Asia	Afghanistan	http://www.malariajournal.com/content/9/1/105	Not targeted
Awab-Unpublished	Awab, G.R.; Pukrittayakamee, S; Woodrow, C.	Unpublished	Comparative Study of Artekin With Standard Malarial Treatment Regimens in Afganistan	Unpublished						Asia	Afghanistan		Included
Bassat-2009	Bassat, Q.;Mulenga, M.;Tinto, H.;Piola, P.;Borrmann, S.;Menendez, C.;Nambozi, M.;Valea, I.;Nabasumba, C.;Sasi, P.;Bacchieri, A.;Corsi, M.;Ubben, D.;Talisuna, A.;D'Alessandro, U.	2009	Dihydroartemisinin-piperaquine and artemether-lumefantrine for treating uncomplicated malaria in African children: a randomised, non-inferiority trial	PloS one	4	11	e7871	BACKGROUND: Artemisinin combination therapies (ACTs) are currently the preferred option for treating uncomplicated malaria. Dihydroartemisinin-piperaquine (DHA-PQP) is a promising fixed-dose ACT with limited information on its safety and efficacy in African children. METHODOLOGY/PRINCIPAL FINDINGS: The non-inferiority of DHA-PQP versus artemether-lumefantrine (AL) in children 6-59 months old with…	19936217	Africa	Multicentred	http://www.plosone.org/article/info:doi/10.1371/journal.pone.0007871	Included
Borrmann-2011	Borrmann, S.;Sasi, P.;Mwai, L.;Bashraheil, M.;Abdallah, A.;Muriithi, S.;Fruhauf, H.;Schaub, B.;Pfeil, J.;Peshu, J.;Hanpithakpong, W.;Rippert, A.;Juma, E.;Tsofa, B.;Mosobo, M.;Lowe, B.;Osier, F.;Fegan, G.;Lindegardh, N.;Nzila, A.;Peshu, N.;Mackinnon, M.;Marsh, K.	2011	Declining Responsiveness of Plasmodium falciparum Infections to Artemisinin-Based Combination Treatments on the Kenyan Coast	PloS one	6	11	e26005	BACKGROUND: The emergence of artemisinin-resistant P. falciparum malaria in South-East Asia highlights the need for continued global surveillance of the efficacy of artemisinin-based combination therapies. METHODS: On the Kenyan coast we studied the treatment responses in 474 children 6-59 months old with uncomplicated P. falciparum malaria in a randomized controlled trial of dihydroartemisinin-p…	22102856	Africa	Kenya	http://www.plosone.org/article/info%3Adoi%2F10.1371%2Fjournal.pone.0026005	Included
Denis-2002	Denis, M. B.;Davis, T. M.;Hewitt, S.;Incardona, S.;Nimol, K.;Fandeur, T.;Poravuth, Y.;Lim, C.;Socheat, D.	2002	Efficacy and safety of dihydroartemisinin-piperaquine (Artekin) in Cambodian children and adults with uncomplicated falciparum malaria	Clinical infectious diseases	35	12	1469-76	The safety and efficacy of a novel combination of dihydroartemisinin (DHA) and piperaquine, Artekin (Holleykin Pharmaceuticals), were assessed in 106 patients (76 children and 30 adults) with uncomplicated falciparum malaria from 2 remote areas in Cambodia. Age-based doses were given at 0, 8, 24, and 32 h. Mean total DHA and piperaquine doses were 9.1 and 73.9 mg/kg, respectively, for children an…	12471565	Asia	Cambodia	http://www.ncbi.nlm.nih.gov/pubmed/12471565	Not targeted
Gargano-2012	Gargano N, Ubben D, Tommasini S, Bacchieri A, Corsi M, Bhattacharyya PC, Rao BH, Dubashi N, Dev V, Ghosh SK, Kumar A, Srivastava B, Valecha N.	2012	Therapeutic efficacy and safety of dihydroartemisinin-piperaquine versus artesunate-mefloquine in uncomplicated Plasmodium falciparum malaria in India	Malaria journal	11	233	doi:10.1186/1475-2875-11-233	BACKGROUND:Resistance in Plasmodium falciparum to commonly used anti-malarial drugs, especially chloroquine, is being increasingly documented in India. By 2007, the first-line treatment for uncomplicated malaria has been revised to recommend artemisinin-based combination therapy (ACT) for all confirmed P. falciparum cases. OBJECTIVE: The objective of this study was to compare the efficacy, safety…	22818552	Asia	India	http://www.malariajournal.com/content/11/1/233	Excluded
Gaye-Unpublished	Gaye, O.; Ndiaye, J.L; Faye, B.; Tine, R.; Sylla, K.; Ba, M.S.; Pene, M.; Sow, D.	Unpublished	Study on the efficacy of antimalarial drugs in the suburbs of Dakar in collaboration with the NMCP and the WHO	Unpublished						Africa	Senegal		Included
Giao-2004	Giao, P. T.;de, V. P. J.;Hung, l. Q.;Binh, T. Q.;Nam, N. V.;Kager, P. A.	2004	CV8, a new combination of dihydroartemisinin, piperaquine, trimethoprim and primaquine, compared with atovaquone-proguanil against falciparum malaria in Vietnam	Tropical medicine & international health	9	2	209-16	OBJECTIVES: To study a new combination, based on dihydroartemisinin and piperaquine (CV8) and atovaquone/proguanil (Malarone) for treatment of uncomplicated falciparum malaria in Vietnam. METHODS: Vietnamese adults with falciparum malaria were allocated randomly to treatment with dihydroartemisinin/piperaquine/trimethoprim/primaquine 256/2560/720/40 mg (CV8, n = 84) or Malarone 3000/1200 mg (n = …	15040557	Asia	Vietnam	http://onlinelibrary.wiley.com/doi/10.1046/j.1365-3156.2003.01180.x/abstract	Not targeted
Grande-2007	Grande, T.;Bernasconi, A.;Erhart, A.;Gamboa, D.;Casapia, M.;Delgado, C.;Torres, K.;Fanello, C.;Llanos-Cuentas, A.;D'Alessandro, U.	2007	A randomised controlled trial to assess the efficacy of dihydroartemisinin-piperaquine for the treatment of uncomplicated falciparum malaria in Peru	PloS one	2	10	e1101	BACKGROUND: Multi-drug resistant falciparum malaria is an important health problem in the Peruvian Amazon region. We carried out a randomised open label clinical trial comparing mefloquine-artesunate, the current first line treatment in this region, with dihydroartemisinin-piperaquine. METHODS AND FINDINGS: Between July 2003 and July 2005, 522 patients with P. falciparum uncomplicated malaria wer…	17971864	S.America	Peru	http://www.plosone.org/article/info:doi/10.1371/journal.pone.0001101	Included
Hasugian-2007	Hasugian, A. R.;Purba, H. L.;Kenangalem, E.;Wuwung, R. M.;Ebsworth, E. P.;Maristela, R.;Penttinen, P. M.;Laihad, F.;Anstey, N. M.;Tjitra, E.;Price, R. N.	2007	Dihydroartemisinin-piperaquine versus artesunate-amodiaquine: superior efficacy and posttreatment prophylaxis against multidrug-resistant Plasmodium falciparum and Plasmodium vivax malaria	Clinical infectious diseases	44	8	1067-74	BACKGROUND: Antimalarial drug resistance is now well established in both Plasmodium falciparum and Plasmodium vivax. In southern Papua, Indonesia, where both strains of plasmodia coexist, we have been conducting a series of studies to optimize treatment strategies. METHODS: We conducted a randomized trial that compared the efficacy and safety of dihydroartemisinin-piperaquine (DHP) with artesunat…	17366451	Asia	Indonesia	http://cid.oxfordjournals.org/content/44/8/1067.abstract	Included
Janssens-2007	Janssens, B.;van, H. M.;Goubert, L.;Chan, S.;Uong, S.;Nong, S.;Socheat, D.;Brockman, A.;Ashley, E. A.;Van, D. W.	2007	A randomized open study to assess the efficacy and tolerability of dihydroartemisinin-piperaquine for the treatment of uncomplicated falciparum malaria in Cambodia	Tropical medicine & international health	12	2	251-9	OBJECTIVES: To compare the efficacy and tolerability of dihydroartemisinin-piperaquine (DHA-PQP) with that of a 3-day regimen of mefloquine and artesunate (MAS3) for the treatment of uncomplicated falciparum malaria in Cambodia. METHOD: Randomized open-label non-inferiority study over 64 days. RESULTS: Four hundred and sixty-four patients were included in the study. The polymerase chain reaction …	17300633	Asia	Cambodia	http://onlinelibrary.wiley.com/doi/10.1111/j.1365-3156.2006.01786.x/abstract	Included
Kakuru-2013	Kakuru A, Jagannathan P, Arinaitwe E, Wanzira H, Muhindo M, Bigira V, Osilo E, Homsy J, Kamya MR, Tappero JW, Dorsey G.	2013	The Effects of ACT Treatment and TS Prophylaxis on Plasmodium falciparum Gametocytemia in a Cohort of Young Ugandan Children.	The American journal of tropical medicine and hygiene	88	4	736-43	Abstract. Artemisinin-based combination therapies (ACTs) and trimethoprim-sulfamethoxazole (TS) prophylaxis are important tools for malaria control, but there are concerns about their effect on gametocytes, the stage of the parasite responsible for transmission. We conducted a longitudinal clinical trial in a cohort of HIV-infected and uninfected children living in an area of high malaria transmi…	23382157	Africa	Uganda	http://www.ajtmh.org/content/88/4/736.long	Not targeted
Kamya-2007	Kamya, M. R.;Yeka, A.;Bukirwa, H.;Lugemwa, M.;Rwakimari, J. B.;Staedke, S. G.;Talisuna, A. O.;Greenhouse, B.;Nosten, F.;Rosenthal, P. J.;Wabwire-Mangen, F.;Dorsey, G.	2007	Artemether-lumefantrine versus dihydroartemisinin-piperaquine for treatment of malaria: a randomized trial	PLoS clinical trials	2	5	e20	OBJECTIVES: To compare the efficacy and safety of artemether-lumefantrine (AL) and dihydroartemisinin-piperaquine (DP) for treating uncomplicated falciparum malaria in Uganda. DESIGN: Randomized single-blinded clinical trial. SETTING: Apac, Uganda, an area of very high malaria transmission intensity. PARTICIPANTS: Children aged 6 mo to 10 y with uncomplicated falciparum malaria. INTERVENTION: Tre…	17525792	Africa	Uganda	http://clinicaltrials.ploshubs.org/article/info%3Adoi%2F10.1371%2Fjournal.pctr.0020020	Included
Karema-2006	Karema, C.;Fanello, C. I.;van, O. C.;van, G. J. P.;van, D. W.;Ngamije, D.;D'Alessandro, U.	2006	Safety and efficacy of dihydroartemisinin/piperaquine (Artekin) for the treatment of uncomplicated Plasmodium falciparum malaria in Rwandan children	Transactions of the Royal Society of Tropical Medicine and Hygiene	100	12	1105-11	Summary In Rwanda, amodiaquine+sulfadoxine/pyrimethamine (AQ+SP) is the current first-line treatment for malaria, introduced in 2001 as an interim strategy before the future deployment of an artemisinin-based combination treatment (ACT). Dihydroartemisinin/piperaquine (DHA-PQP) is a new co-formulated and well tolerated ACT increasingly used in Southeast Asia where it has proved to be highly effec…	16766006	Africa	Rwanda	http://www.ncbi.nlm.nih.gov/pmc/articles/PMC3055852/	Included
Karunajeewa-2008a	Karunajeewa, H. A.;Mueller, I.;Senn, M.;Lin, E.;Law, I.;Gomorrai, P. S.;Oa, O.;Griffin, S.;Kotab, K.;Suano, P.;Tarongka, N.;Ura, A.;Lautu, D.;Page-Sharp, M.;Wong, R.;Salman, S.;Siba, P.;Ilett, K. F.;Davis, T. M.	2008	A trial of combination antimalarial therapies in children from Papua New Guinea	The New England journal of medicine	359	24	2545-57	BACKGROUND: Malaria control is difficult where there is intense year-round transmission of multiple plasmodium species, such as in Papua New Guinea. METHODS: Between April 2005 and July 2007, we conducted an open-label, randomized, parallel-group study of conventional chloroquine-sulfadoxine-pyrimethamine and artesunate-sulfadoxine-pyrimethamine, dihydroartemisinin-piperaquine, and artemether-lum…	19064624	Asia	Papua New Guinea	http://www.nejm.org/doi/full/10.1056/NEJMoa0804915	Included
Karunajeewa-2008b	Karunajeewa, H. A.;Ilett, K. F.;Mueller, I.;Siba, P.;Law, I.;Page-Sharp, M.;Lin, E.;Lammey, J.;Batty, K. T.;Davis, T. M.	2008	Pharmacokinetics and efficacy of piperaquine and chloroquine in Melanesian children with uncomplicated malaria	Antimicrobial agents and chemotherapy	52	1	237-43	The disposition of chloroquine (CQ) and the related 4-aminoquinoline, piperaquine (PQ), were compared in Papua New Guinean children with uncomplicated malaria. Twenty-two children were randomized to 3 days of PQ phosphate at 20 mg/kg/day (12 mg of PQ base/kg/day) coformulated with dihydroartemisinin (DHA-PQ), and twenty children were randomized to 3 days of CQ at 10 mg base/kg/day with a single d…	17967917	Asia	Papua New Guinea	http://aac.asm.org/content/52/1/237.short	Not Available
Krudsood-2007	Krudsood, S.;Tangpukdee, N.;Thanchatwet, V.;Wilairatana, P.;Srivilairit, S.;Pothipak, N.;Jianping, S.;Guoqiao, L.;Brittenham, G. M.;Looareesuwan, S.	2007	Dose ranging studies of new artemisinin-piperaquine fixed combinations compared to standard regimens of artemisisnin combination therapies for acute uncomplicated falciparum malaria	The Southeast Asian journal of tropical medicine and public health	38	6	971-8	To determine the optimum dose of artemisinin-piperaquine combination therapies for acute uncomplicated Plasmodium falciparum malaria, we examined 7 candidate regimens in 411 patients admitted to the Bangkok Hospital for Tropical Diseases. The studies were performed from May 2005 to October 2005 and November 2005 to June 2006. We compared 3-day courses of artesunate-mefloquine, artemether-lumefant…	18613536	Asia	Thailand	http://www.ncbi.nlm.nih.gov/pmc/articles/PMC3114414/	Not targeted
Leang-2013	Leang R, Barrette A, Bouth DM, Menard D, Abdur R, Duong S, Ringwald P.	2013	Efficacy of dihydroartemisinin-piperaquine for treatment of uncomplicated Plasmodium falciparum and Plasmodium vivax in Cambodia, 2008 to 2010.	Antimicrobial agents and chemotherapy	57	2	818-26	Abstract: We describe here the results of antimalarial therapeutic efficacy studies conducted in Cambodia from 2008 to 2010. A total of 15 studies in four sentinel sites were conducted using dihydroartemisinin-piperaquine (DP) for the treatment of Plasmodium falciparum infection and chloroquine (CQ) and DP for the treatment of P. vivax infection. All studies were performed according to the standa…	23208711	Asia	Cambodia	http://aac.asm.org/content/57/2/818.long	Not Available
Mayxay-2006	Mayxay, M.;Thongpraseuth, V.;Khanthavong, M.;Lindegardh, N.;Barends, M.;Keola, S.;Pongvongsa, T.;Phompida, S.;Phetsouvanh, R.;Stepniewska, K.;White, N. J.;Newton, P. N.	2006	An open, randomized comparison of artesunate plus mefloquine vs. dihydroartemisinin-piperaquine for the treatment of uncomplicated Plasmodium falciparum malaria in the Lao People's Democratic Republic (Laos)	Tropical medicine & international health	11	8	1157-65	OBJECTIVE: To determine the efficacy and safety of oral dihydroartemisinin-piperaquine (DP, Artekin) in the treatment of uncomplicated Plasmodium falciparum malaria in southern Laos. METHODS: An open, randomized clinical trial of oral artesunate-mefloquine (AM) vs. DP in 220 patients with acute uncomplicated falciparum malaria in Savannakhet Province, Laos. RESULTS: The 42-day cure rates (95% CI)…	16903879	Asia	Laos	http://onlinelibrary.wiley.com/doi/10.1111/j.1365-3156.2006.01671.x/abstract	Included
Mayxay-2010	Mayxay, M.;Keomany, S.;Khanthavong, M.;Souvannasing, P.;Stepniewska, K.;Khomthilath, T.;Keola, S.;Pongvongsa, T.;Phompida, S.;Ubben, D.;Valecha, N.;White, N. J.;Newton, P. N.	2010	A phase III, randomized, non-inferiority trial to assess the efficacy and safety of dihydroartemisinin-piperaquine in comparison with artesunate-mefloquine in patients with uncomplicated Plasmodium falciparum malaria in southern Laos	The American journal of tropical medicine and hygiene	83	6	1221-9	We conducted an open, randomized clinical trial of oral dihydroartemisinin-piperaquine (DP) versus artesunate-mefloquine (AM) in 300 patients in Laos with uncomplicated Plasmodium falciparum malaria as part of a multicentre study in Asia. Survival analysis and adjustment for re-infection showed that the 63-day cure rates (95% confidence interval [CI]) were 100% for AM and 99.5% (96.4-99.8%) for D…	21118925	Asia	Laos	http://www.ajtmh.org/content/83/6/1221	Excluded
Menan-2011	Menan, H.;Faye, O.;Same-Ekobo, A.;Oga, A. S.;Faye, B.;Kiki-Barro, C. P.;Kuete, T.;N'Diaye, J. L.;Vicky, A. M.;Tine, R.;Yavo, W.;Kane, D.;Kassi, K. F.;Kone, M.	2011	Comparative study of the efficacy and tolerability of dihydroartemisinin - piperaquine - trimethoprim versus artemether - lumefantrine in the treatment of uncomplicated Plasmodium falciparum malaria in Cameroon, Ivory Coast and Senegal	Malaria journal	10	1	185	ABSTRACT: BACKGROUND: The ACT recommended by WHO is very effective and well-tolerated. However, these combinations need to be administered for three days, which may limit adherence to treatment. The combination of dihydroartemisinin - piperaquine phosphate - trimethoprim (Artecom(R), Odypharm Ltd), which involves treatment over two days, appears to be a good alternative, particularly in malaria-e…	21740570	Africa	Multicentred	http://www.malariajournal.com/content/10/1/185	Not targeted
Mens-2008	Mens, P. F.;Sawa, P.;van, A. S. M.;Versteeg, I.;Omar, S. A.;Schallig, H. D.;Kager, P. A.	2008	A randomized trial to monitor the efficacy and effectiveness by QT-NASBA of artemether-lumefantrine versus dihydroartemisinin-piperaquine for treatment and transmission control of uncomplicated Plasmodium falciparum malaria in western Kenya	Malaria journal	7		237	BACKGROUND: Many countries have implemented artemisinin-based combination therapy (ACT) for the first-line treatment of malaria. Although many studies have been performed on efficacy and tolerability of the combination arthemeter-lumefantrine (AL) or dihydroartemisinin-piperaquine (DP), less is known of the effect of these drugs on gametocyte development, which is an important issue in malaria co…	19017387	Africa	Kenya	http://www.malariajournal.com/content/7/1/237	Included
Nambei-2005	Nambei, W. S.;Gbagba, F. E.;Ndemanga, J.;Doui-Doumgba, K.;Diallo, T. O.;Ndadjimbaye, V.;Flori, P.;Perraut, R.;Garraud, O.	2005	Efficacy comparison between anti-malarial drugs in Africans presenting with mild malaria in the Central Republic of Africa: a preliminary study	Parasite (Paris France)	12	1	73-7	Drug resistance to Plasmodium falciparum contributes to major health problems in central Africa and, as a consequence, poverty. We have analyzed the efficacy of three currently available antimalarial drugs to treat symptomatic, uncomplicated P. falciparum malaria in semi-immune adults living in Bangui, Central Republic of Africa. 210 consecutive individuals were enrolled in the survey, of which 4…	15828586	Africa	Central Rep of Africa	http://www.ncbi.nlm.nih.gov/pubmed/15828586	Not targeted
Nambozi-2011	Nambozi, M.;Van, G. J. P.;Hachizovu, S.;Chaponda, M.;Mukwamataba, D.;Mulenga, M.;Ubben, D.;D'Alessandro, U.	2011	Safety and efficacy of dihydroartemisinin-piperaquine versus artemether-lumefantrine in the treatment of uncomplicated Plasmodium falciparum malaria in Zambian children	Malaria journal	10		50	BACKGROUND: Malaria in Zambia remains a public health and developmental challenge, affecting mostly children under five and pregnant women. In 2002, the first-line treatment for uncomplicated malaria was changed to artemether-lumefantrine (AL) that has proved to be highly efficacious against multidrug resistant Plasmodium falciparum. OBJECTIVE: The study objective was to determine whether dihydro…	21352609	Africa	Zambia	http://www.malariajournal.com/content/10/1/50	Not Available
Phyo-2011	Phyo, A. P. ;Lwin, K. M.; Price, R. N.;Ashley, E. A.; Russell, B.;Sriprawat, K.;Lindegardh, N.;Singhasivanon, P.;White, N.J.;Nosten, F.	2011	Dihydroartemisinin-piperaquine versus chloroquine in the treatment of P.vivax malaria in Thailand: a randomized controlled trial	Clinical infectious diseases	53	10	977-984	Background. Chloroquine (CQ) remains the treatment of choice for Plasmodium vivax malaria. Initially confined to parts of Indonesia and Papua, resistance of P. vivax to CQ seems to be spreading, and alternative treatments are required. Methods. We conducted a randomized controlled study to compare the efficacy and the tolerability of CQ and dihydroartemisinin-piperaquine (DP) in 500 adults and ch…	22002979	Asia	Thailand	http://cid.oxfordjournals.org/content/53/10/977.short	Not targeted
Ratcliff-2007	Ratcliff, A.;Siswantoro, H.;Kenangalem, E.;Maristela, R.;Wuwung, R. M.;Laihad, F.;Ebsworth, E. P.;Anstey, N. M.;Tjitra, E.;Price, R. N.	2007	Two fixed-dose artemisinin combinations for drug-resistant falciparum and vivax malaria in Papua, Indonesia: an open-label randomised comparison	Lancet	369	9563	757-65	BACKGROUND: The burden of Plasmodium vivax infections has been underappreciated, especially in southeast Asia where chloroquine resistant strains have emerged. Our aim was to compare the safety and efficacy of dihydroartemisinin-piperaquine with that of artemether-lumefantrine in patients with uncomplicated malaria caused by multidrug-resistant P falciparum and P vivax. METHODS: 774 patients in s…	17336652	Asia	Indonesia	http://www.lancet.com/journals/lancet/article/PIIS0140-6736(07)60160-3/abstract	Included
Rijken-2008	Rijken, MJ; McGready, R; Boel, ME; Barends, M; Proux, S; Pimanpanarak, M; Singhasivanon, P; Nosten, F	2008	Dihydroartemisinin-piperaquine rescue treatment of multidrug-resistant Plasmodium falciparum malaria in pregnancy: a preliminary report	The American journal of tropical medicine and hygiene	78	4	543-5	Dihydroartemisinin-piperaquine (DHA-PPQ) is a promising new artemisinin combination treatment. There are no published data on the intentional use of the drug in pregnancy. Between June 2006 and January 2007, 50 Karen pregnant women with recurrent P. falciparum infections, despite 7-day treatments with quinine or artesunate (+/-clindamycin) or both, were treated with DHA-PPQ. This rescue treatment…	18385345	Asia	Thailand	http://www.ajtmh.org/content/78/4/543.full	Not targeted
Sawa-2013	Sawa, P.; Shekalaghe, S.A.; Drakeley, C.J.; Sutherland, C.J.; Mweresa, C.K.; Baidjoe, A.Y.; Manjurano, A.; Kavishe, R.A.; Beshir, K.B.; Yussuf, R.U.; Omar, S.A.; Hermsen, C.C.; Okell, L.; Schallig, H.D.; Sauerwein, R.W. Hallett RL, Bousema T	2013	Malaria transmission after artemether-lumefantrine and dihydroartemisinin-piperaquine: a randomized trial	The Journal of infectious diseases	207	11	1637-1645	Background. Artemisinin-based combination therapy (ACT) reduces the potential for malaria transmission, compared with non-ACTs. It is unclear whether this effect differs between ACTs.Methods. A total of 298 children (age, 6 months to 10 years) with uncomplicated falciparum malaria were randomized to artemether-lumefantrine (AL; n = 153) or dihydroartemisinin-piperaquine (DP; n = 145) in Mbita, a …	23468056	Africa	Kenya	http://jid.oxfordjournals.org/content/early/2013/03/22/infdis.jit077.long	Included
Smithuis-2006	Smithuis, F.;Kyaw, M. K.;Phe, O.;Aye, K. Z.;Htet, L.;Barends, M.;Lindegardh, N.;Singtoroj, T.;Ashley, E.;Lwin, S.;Stepniewska, K.;White, N. J.	2006	Efficacy and effectiveness of dihydroartemisinin-piperaquine versus artesunate-mefloquine in falciparum malaria: an open-label randomised comparison	Lancet	367	9528	2075-85	BACKGROUND: Artemisinin-based combinations are judged the best treatments for multidrug-resistant Plasmodium falciparum malaria. Artesunate-mefloquine is widely recommended in southeast Asia, but its high cost and tolerability profile remain obstacles to widespread deployment. To assess whether dihydroartemisinin-piperaquine is a suitable alternative to artesunate-mefloquine, we compared the safe…	16798391	Asia	Myanmar	http://www.lancet.com/journals/lancet/article/PIIS0140-6736(06)68931-9/abstract	Included
Smithuis-2010	Smithuis, F.;Kyaw, M. K.;Phe, O.;Win, T.;Aung, P. P.;Oo, A. P.;Naing, A. L.;Nyo, M. Y.;Myint, N. Z.;Imwong, M.;Ashley, E.;Lee, S. J.;White, N. J.	2010	Effectiveness of five artemisinin combination regimens with or without primaquine in uncomplicated falciparum malaria: an open-label randomised trial	The Lancet infectious diseases	10	10	673-81	BACKGROUND: Artemisinin-combination therapy (ACT) is recommended as first-line treatment of falciparum malaria throughout the world, and fixed-dose combinations are preferred by WHO; whether a single gametocytocidal dose of primaquine should be added is unknown. We aimed to compare effectiveness of four fixed-dose ACTs and a loose tablet combination of artesunate and mefloquine, and assess the ad…	20832366	Asia	Myanmar	http://www.thelancet.com/journals/laninf/article/PIIS1473-3099(10)70187-0/abstract	Included
Song-2011	Song, J.;Socheat, D.;Tan, B.;Seila, S.;Xu, Y.;Ou, F.;Sokunthea, S.;Sophorn, L.;Zhou, C.;Deng, C.;Wang, Q.;Li, G.	2011	Randomized trials of artemisinin-piperaquine, dihydroartemisinin-piperaquine phosphate and artemether-lumefantrine for the treatment of multi-drug resistant falciparum malaria in Cambodia-Thailand border area	Malaria journal	10	1	231	ABSTRACT: BACKGROUND: Drug resistance of falciparum malaria is a global problem. Sulphadoxine/pyrimethamine-resistant and mefloquine-resistant strains of falciparum malaria have spread in Southeast Asia at lightning speed in 1980s-1990s, and the Cambodia-Thailand border is one of the malaria epidemic areas with the most severe forms of multi-drug resistant falciparum malaria. METHODS: Artemisinin…	21827706	Asia	Cambodia	http://www.malariajournal.com/content/10/1/231/abstract	Not targeted
Sutanto-2012a	Sutanto I, Suprijanto S, Kosasih A, Dahlan MS, Syafruddin D, Kusriastuti R, Hawley WA, Lobo NF, Ter Kuile FO.	2012	The effect of primaquine on gametocyte development and clearance in the treatment of uncomplicated falciparum malaria with dihydroartemisinin-piperaquine in South sumatra, Western indonesia: an open-label, randomized, controlled trial	Clinical infectious diseases	56	6	685-93	BACKGROUND:Artemisinin-based combination therapy is very effective in clearing asexual stages of malaria and reduces gametocytemia, but may not affect mature gametocytes. Primaquine is the only commercially available drug that eliminates mature gametocytes. METHODS: We conducted a 2-arm, open-label, randomized, controlled trial to evaluate the efficacy of single-dose primaquine (0.75 mg/kg) follo…	23175563	Asia	Indonesia	http://cid.oxfordjournals.org/content/56/5/685.long	Not Available
Sutanto-2012b	Sutanto I, Tjahjono B, Basri H, Taylor WR, Putri FA, Meilia RA, Setiabudy R, Nurleila S, Ekawati LL, Elyazar I, Farrar J, Sudoyo H, Baird JK.	2012	Randomized, Open-Label Trial of Primaquine against Vivax Malaria Relapse in Indonesia.	Antimicrobial agents and chemotherapy	57	3	1128-35	Abstract: Radical cure of Plasmodium vivax infection applies blood schizontocidal therapy against the acute attack and hypnozoitocidal therapy against later relapse. Chloroquine and primaquine have been used for 60 years in this manner. Resistance to chloroquine by the parasite now requires partnering other blood schizontocides with primaquine. However, the safety and efficacy of primaquine again…	23254437	Asia	Indonesia	http://aac.asm.org/content/57/3/1128.long	Not targeted
Tangpukdee-2005	Tangpukdee, N.;Krudsood, S.;Thanachartwet, W.;Chalermrut, K.;Pengruksa, C.;Srivilairit, S.;Silachamroon, U.;Wilairatana, P.;Phongtananant, S.;Kano, S.;Looareesuwan, S.	2005	An open randomized clinical trial of Artekin vs artesunate-mefloquine in the treatment of acute uncomplicated falciparum malaria	The Southeast Asian journal of tropical medicine and public health	36	5	1085-91	Malaria remains a major cause of morbidity and mortality in tropical countries and subtropical regions in the world. Southeast Asia has the most resistant malaria parasites in the world, which has limited treatment options in this region. In response to this situation, short-course artemisinin-based combination therapies (ACTs) have been developed. The combination of dihydroartemisinin (DHA) and …	16438129	Asia	Thailand	http://www.tm.mahidol.ac.th/seameo/publication.htm	Not targeted
Thanh-2009	Thanh, N. X.;Trung, T. N.;Phong, N. C.;Thien, N. X.;Dai, B.;Shanks, G. D.;Chavchich, M.;Edstein, M. D.	2009	Open label randomized comparison of dihydroartemisinin-piperaquine and artesunate-amodiaquine for the treatment of uncomplicated Plasmodium falciparum malaria in central Vietnam	Tropical medicine & international health	14	5	504-11	OBJECTIVE: Artesunate-amodiaquine (AAQ) is efficacious for the treatment of uncomplicated Plasmodium falciparum malaria in Africa, but little is known about its efficacy in Southeast Asia. We compared the efficacy of dihydroartemisinin-piperaquine (DHP) and AAQ against falciparum malaria in central Vietnam. METHODS: Open, randomized clinical trial of 116 patients (36 children aged 6-14 years, 80 …	19320869	Asia	Vietnam	http://onlinelibrary.wiley.com/doi/10.1111/j.1365-3156.2009.02269.x/abstract	Not Available
Tjitra-2012	Tjitra, E.;Hasugian, A. R.;Siswantoro, H.;Prasetyorini, B.;Ekowatiningsih, R.;Yusnita, E. A.;Purnamasari, T.;Driyah, S.;Salwati, E.;Nurhayati, N.;Yuwarni, E.;Yanuar, L.;Labora, J.;Wijayanto, B.;Amansyah, F.;Dedang, T. A.;Purnama, A.;Trihono, T.	2012	Efficacy and safety of artemisinin-naphthoquine versus dihydroartemisinin-piperaquine in adult patients with uncomplicated malaria: a multi-centre study in Indonesia	Malaria journal	11	1	153	ABSTRACT: BACKGROUND: A practical and simple regimen for all malaria species is needed towards malaria elimination in Indonesia. It is worth to compare the efficacy and safety of a single dose of artemisinin-naphthoquine (AN) with a three-day regimen of dihydroartemisinin-piperaquine (DHP), the existing programme drug, in adults with uncomplicated symptomatic malaria. METHODS: This is a phase III…	22554203	Asia	Indonesia	http://www.malariajournal.com/content/11/1/153	Not Available
Tran-2004	Tran, T. H.;Dolecek, C.;Pham, P. M.;Nguyen, T. D.;Nguyen, T. T.;Le, H. T.;Dong, T. H.;Tran, T. T.;Stepniewska, K.;White, N. J.;Farrar, J.	2004	Dihydroartemisinin-piperaquine against multidrug-resistant Plasmodium falciparum malaria in Vietnam: randomised clinical trial	Lancet	363	9402	18-22	BACKGROUND: Southeast Asia has the most resistant malaria parasites in the world, which severely limits treatment options. There is general acceptance that to combat resistance, combinations of antimalarial drugs that include an artemisinin derivative should be used, and, if possible, these should be formulated in a single tablet. METHODS: We did a pilot randomised study in a tertiary referral ho…	14723988	Asia	Vietnam	http://www.thelancet.com/journals/lancet/article/PIIS0140-6736(03)15163-X/fulltext	Not Available
Tran-2012	Tran TH, Nguyen TT, Nguyen HP, Boni MF, Ngo VT, Nguyen TN, Le HT, Cao QT, Pham VT, Phung DT, Le TL, Le TD, Merson L, Dolecek C, Stepniewska K, Ringwald P, White NJ, Farrar J, Wolbers M.	2012	In vivo susceptibility of Plasmodium falciparum to artesunate in Binh Phuoc Province, Vietnam.	Malaria journal	11	355	doi:10.1186/1475-2875-11-355	BACKGROUND:By 2009, there were worrying signs from western Cambodia that parasitological responses to artesunate-containing treatment regimens for uncomplicated Plasmodium falciparum malaria were slower than elsewhere which suggested the emergence of artemisinin resistance. Vietnam shares a long land border with Cambodia with a large number of migrants crossing it on a daily basis. Therefore, the…	23101492	Asia	Vietnam	http://www.malariajournal.com/content/11/1/355	Included
Trung-2009	Trung, T. N.;Tan, B.;Van, P. D.;Song, J. P.	2009	A randomized, controlled trial of artemisinin-piperaquine vs dihydroartemisinin-piperaquine phosphate in treatment of falciparum malaria	Chinese journal of integrative medicine	15	3	189-92	OBJECTIVE: The study aimed to evaluate and compare the efficacy and safety of dihydroartemisinin-piperaquine phosphate (Artekin) and artemisinin-piperaquine (Artequick) in the treatment of uncomplicated falciparum malaria. METHODS: A total of 103 uncomplicated falciparum malaria patients were enrolled and randomly assigned to two groups: 52 cases in the Artequick group, and 51 cases in the Arteki…	19568711	Asia	Vietnam	http://www.springerlink.com/content/4g8n37748l814385/	Not targeted
Valecha-2010	Valecha, N.;Phyo, A. P.;Mayxay, M.;Newton, P. N.;Krudsood, S.;Keomany, S.;Khanthavong, M.;Pongvongsa, T.;Ruangveerayuth, R.;Uthaisil, C.;Ubben, D.;Duparc, S.;Bacchieri, A.;Corsi, M.;Rao, B. H.;Bhattacharya, P. C.;Dubhashi, N.;Ghosh, S. K.;Dev, V.;Kumar, A.;Pukrittayakamee, S.	2010	An open-label, randomised study of dihydroartemisinin-piperaquine versus artesunate-mefloquine for falciparum malaria in Asia	PloS one	5	7	e11880	BACKGROUND: The artemisinin-based combination treatment (ACT) of dihydroartemisinin (DHA) and piperaquine (PQP) is a promising novel anti-malarial drug effective against multi-drug resistant falciparum malaria. The aim of this study was to show non-inferiority of DHA/PQP vs. artesunate-mefloquine (AS+MQ) in Asia. METHODS AND FINDINGS: This was an open-label, randomised, non-inferiority, 63-day fo…	20689583	Asia	Multicentred	http://www.plosone.org/article/info%3Adoi%2F10.1371%2Fjournal.pone.0011880	Included
Whegang-2010	Whegang, S. Y.;Tahar, R.;Foumane, V. N.;Soula, G.;Gwet, H.;Thalabard, J. C.;Basco, L. K.	2010	Efficacy of non-artemisinin- and artemisinin-based combination therapies for uncomplicated falciparum malaria in Cameroon	Malaria journal	9		56	BACKGROUND: The use of drug combinations, including non-artemisinin-based and artemisinin-based combination therapy (ACT), is a novel strategy that enhances therapeutic efficacy and delays the emergence of multidrug-resistant Plasmodium falciparum. Its use is strongly recommended in most sub-Saharan African countries, namely Cameroon, where resistance to chloroquine is widespread and antifolate r…	20170477	Africa	Cameroon	http://www.malariajournal.com/content/9/1/56	Not Available
Wilairatana-2002	Wilairatana, P.;Krudsood, S.;Chalermrut, K.;Pengruksa, C.;Srivilairit, S.;Silachamroon, U.;Treeprasertsuk, S.;Looareesuwan, S.	2002	An open randomized clinical trial of Artecom vs artesunate-mefloquine in the treatment of acute uncomplicated falciparum malaria in Thailand	The Southeast Asian journal of tropical medicine and public health	33	3	519-24	The efficacy and safety of Artecom were assessed in an open randomized trial in adults presenting with acute, uncomplicated Plasmodium falciparum malaria in Thailand. Three hundred and fifty-two patients were randomly enroled at the ratio of 2:1 into group A:B and received Artecom (group A) and the standard combination of artesunate and mefloquine (group B) respectively. All patients had rapid in…	12693586	Asia	Thailand	http://www.tm.mahidol.ac.th/seameo/publication.htm	Not targeted
Yavo-2011	Yavo, W.;Faye, B.;Kuete, T.;Djohan, V.;Oga, S. A.;Kassi, R. R.;Diatta, M.;Ama, M. V.;Tine, R.;Ndiaye, J. L.;Evi, J. B.;Same-Ekobo, A.;Faye, O.;Kone, M.	2011	Multicentric assessment of the efficacy and tolerability of dihydroartemisinin-piperaquine compared to artemether-lumefantrine in the treatment of uncomplicated Plasmodium falciparum malaria in sub-Saharan Africa	Malaria journal	10	1	198	ABSTRACT: BACKGROUND: The choice of appropriate artemisinin-based combination therapy depends on several factors (cost, efficacy, safety, reinfection rate and simplicity of administration). To assess whether the combination dihydroartemisinin-piperaquine (DP) could be an alternative to artemether-lumefantrine (AL), the efficacy and the tolerability of the two products for the treatment of uncompl…	21774826	Africa	Multicentred	http://www.malariajournal.com/content/10/1/198/abstract	Included
Yeka-2008	Yeka, A.;Dorsey, G.;Kamya, M. R.;Talisuna, A.;Lugemwa, M.;Rwakimari, J. B.;Staedke, S. G.;Rosenthal, P. J.;Wabwire-Mangen, F.;Bukirwa, H.	2008	Artemether-lumefantrine versus dihydroartemisinin-piperaquine for treating uncomplicated malaria: a randomized trial to guide policy in Uganda	PloS one	3	6	e2390	BACKGROUND: Uganda recently adopted artemether-lumefantrine (AL) as the recommended first-line treatment for uncomplicated malaria. However, AL has several limitations, including a twice-daily dosing regimen, recommendation for administration with fatty food, and a high risk of reinfection soon after therapy in high transmission areas. Dihydroartemisinin-piperaquine (DP) is a new alternative arte…	18545692	Africa	Uganda	http://www.plosone.org/article/info:doi/10.1371/journal.pone.0002390	Included
Yeka-2013	Yeka, A.; Tibenderana, J.; Achan, J.; D'Alessandro, U.; Talisuna, A.O.	2013	Efficacy of Quinine, Artemether-Lumefantrine and Dihydroartemisinin-Piperaquine as Rescue Treatment for Uncomplicated Malaria in Ugandan Children	PloS one	8	1	e53772	Background The treatment of falciparum malaria poses unique challenges in settings where malaria transmission intensity is high because recurrent infections are common. These could be new infections, recrudescences, or a combination of the two. Though several African countries continue to use quinine as the second line treatment for patients with recurrent infections, there is little information …	23349741	Africa	Uganda	http://www.plosone.org/article/info%3Adoi%2F10.1371%2Fjournal.pone.0053772	Excluded
Zongo-2007	Zongo, I.;Dorsey, G.;Rouamba, N.;Dokomajilar, C.;Sere, Y.;Rosenthal, P. J.;Ouedraogo, J. B.	2007	Randomized comparison of amodiaquine plus sulfadoxine-pyrimethamine, artemether-lumefantrine, and dihydroartemisinin-piperaquine for the treatment of uncomplicated Plasmodium falciparum malaria in Burkina Faso	Clinical infectious diseases	45	11	1453-61	BACKGROUND: Combination antimalarial therapy is advocated to improve treatment efficacy and limit selection of drug-resistant parasites. We compared the efficacies of 3 combination regimens in Bobo-Dioulasso, Burkina Faso: amodiaquine plus sulfadoxine-pyrimethamine, which was recently shown to be highly efficacious at this site; artemether-lumefantrine, the new national first-line antimalarial re…	17990228	Africa	Burkina Faso	http://cid.oxfordjournals.org/content/45/11/1453.abstract	Included

## Sheet: Study Design
											Age Group Enrolment
Reference	Country	Treatment Arm	Formulation	Manufacturer	Supervision	Start Year of Recruitment	End year recruitment	Number of patients with Pf/Mixed	Number of patients with Pv	Number of PCR-confirmed failures	<5yrs	5-15yrs	Adults	Pregnant Women	Length of Follow Up (days)	Pooled Analysis	Reasons for exclusion	Comments
4ABC Study Group-2011	Multicentred	DP	Eurartesim	Sigma Tau	Full	2007	2009	1475	0	22	Yes	No	No	No	180	Included
Adam-2010	Sudan	DP	Duo-cotecxin	Holley Pharm	Full	2009	2010	75	0	0	Yes	Yes	Yes	No	28	Included		Only 47 patients data submitted
Arinaitwe-2009	Uganda	DP	Duo-cotecxin	Holley Pharm	Full	2007	2008	119	0	0	Yes	No	No	No	28	Included
Ashley-2004	Thailand	DP	Artekin	Holleykin Pharmaceutical	Full	2002	2003	246	0	2	Yes	Yes	Yes	No	63	Included		Only 196 of 246 total patients data submitted
Ashley-2004	Thailand	DP Plus Artesunate	Artekin	Holleykin Pharmaceutical	Full	2002	2003	241	0	0	Yes	Yes	Yes	No	63	Included		Extra Artesunate or DHA; only 211 from 241 patients data submitted
Ashley-2005	Thailand	DP	Artekin	Holleykin Pharmaceutical	Full	2003	2004	163	0	0	Yes	Yes	Yes	No	63	Included		4-dose regimen over 3 days; only 143 from 163 patients data submitted
Ashley-2005	Thailand	DP	Artekin	Holleykin Pharmaceutical	Full	2003	2004	170	0	0	Yes	Yes	Yes	No	63	Included		3-dose regimen over 3 days; only 156 from 170 patients data submitted
Awab-2010	Afghanistan	DP	Artekin	Holleypharm	Full	2007	2009	0	268	Pv Only Study	Yes	Yes	Yes	No	56	Not Targeted	Vivax patients only
Awab-Unpublished	Afghanistan	DP	Artekin	Holley Cotec	Full	2007	2010	59	0	0	Yes	Yes	Yes	No	56	Included
Bassat-2009	Multicentred	DP	Eurartesim	Sigma Tau	Full	2005	2006	1038	0	45	No	No	No	No	42	Included
Borrmann-2011	Kenya	DP	Eurartesim	Sigma Tau	Full	2005	2008	233	0	15	Yes	No	No	No	84	Included		150 duplicates from Bassat-2009 excluded
Denis-2002	Cambodia	DP	Artekin	Holleykin Pharmaceuticals	Full	2001	2002	106	0	4	No	No	No	No	28	Not Targeted	2-day regimen
Gargano-2012	India	DP	Eurartesim	Sigma Tau	Full	2006	2007	101	0	1	No	No	Yes	No	63	Excluded	101 duplicates from Valecha-2010
Gaye-Unpublished	Senegal	DP	Duo-cotecxin	Holley-Cotec	Full	2010	2011	124	0	1	Yes	Yes	No	No	42	Included
Giao-2004	Vietnam	DP Plus Trimeth and Primaquine	CV8	Central Pharmaceutical factory 26	Full	2001	2002	82	0	No PCR Results	No	No	Yes	No	28	Not Targeted	no PCR results	4-dose regimen over 3 days
Grande-2007	Peru	DP	Artekin	Holleykin pharmaceuticals	Full	2003	2005	262	0	2	No	No	No	No	63	Included
Hasugian-2007	Indonesia	DP	Artekin	Holley Pharmaceutical	Full	2005	2005	114	54	1	Yes	Yes	Yes	No	42	Included		Only Pf/Mixed Patients included: 114
Janssens-2007	Cambodia	DP	Artekin	Holleykin Pharmaceutical Co. Ltd	Full	2002	2003	228	0	2	Yes	Yes	Yes	No	63	Included
Kakuru-2013	Uganda	DP	Duo-cotecxin	Zhejiang Holley Nanhu Pharmaceutical Co. Ltd.	Full	2007	2008	154	0	0	Yes	No	No	No	28	Not Targeted	subset of Arinaitwe-2009
Kamya-2007	Uganda	DP	Duo-cotecxin	Holley Pharm	Full	2006	2006	211	0	0	No	No	No	No	42	Included
Karema-2006	Rwanda	DP	Artekin	Holleypharm	Full	2003	2004	252	0	11	Yes	Yes	No	No	28	Included
Karunajeewa-2008a	Papua New Guinea	DP	Duo-cotecxin	Beijing Holley-Cotec	Full	2005	2007	145	41	10	Yes	No	No	No	42	Included		Only Pf/Mix Patients included: 123
Karunajeewa-2008b	Papua New Guinea	DP	Duo-cotecxin	Beijing Holley-Cotec	Full	2005	2006	19	2	0	No	Yes	No	No	42	Not Available
Krudsood-2007	Thailand	DP	Artekin	Holleykin Pharmaceuticals	Full	2005	2006	97	0	No PCR Results	No	Yes	Yes	No	28	Not Targeted	no PCR results
Leang-2013	Cambodia	DP	Artekin/Duo-cotecxin	Holleykin Pharmaceutical Co., Ltd./Zhejiang Holley Nanhu Pharmaceutical Co., Ltd.	Not stated	2008	2011	438	390	22	Yes	Yes	Yes	No	42	Not Available
Mayxay-2006	Laos	DP	Artekin	Holleykin Pharmaceutical Co.	Full	2004	2004	110	0	0	No	No	No	No	42	Included
Mayxay-2010	Laos	DP	Eurartesim	Sigma Tau	Full	2005	2006	202	0	2	Yes	Yes	Yes	No	63	Excluded	202 duplicates from Valecha-2010
Menan-2011	Multicentred	DP Plus Trimethoprim	Artecom	Odypharm Ltd	Partial	2008	2009	212	0	2	Yes	Yes	Yes	No	28	Not Targeted	2-day regimen
Mens-2008	Kenya	DP	Eurartesim	Sigma-Tau	Full	2007	2007	73	0	0	Yes	Yes	No	No	28	Included
Nambei-2005	Central Rep of Africa	DP Plus Trimethoprim	Artecom	Tonghe Pharmaceutical CO Ltd/Aspharca	Partial	2001	2001	54	0	No PCR Results	No	No	Yes	No	14	Not Targeted	1-day regimen, 14 days follow up
Nambozi-2011	Zambia	DP	Eurartesim	Sigma Tau	Full	2005	2006	203	0	13	Yes	No	No	No	42	Not Available
Phyo-2011	Thailand	DP	Duo-cotecxin	Holley Pharm	Full	2007	2008	0	248	Pv Only Study	Yes	Yes	Yes	No	63	Not Targeted	Vivax patients only
Ratcliff-2007	Indonesia	DP	Artekin	Holleykin Pharmaceuticals	Full	205	2005	297	90	2	Yes	Yes	Yes	No	42	Included		Only Pf Patients included: 297
Rijken-2008	Thailand	DP	Duo-cotecxin	Holley Pharm PRC	Full	2006	2007	50	0	3	No	No	Yes	Yes	63	Not Targeted	Pregnant women
Sawa-2013	Kenya	DP	Duo-cotecxin	Holley Pharm	Full	2009	2009	145	0	0	Yes	Yes	No	No	42	Included
Smithuis-2006	Myanmar	DP	Artekin	Holleykin Pharmaceuticals	unsupervised	2003	2004	171	0	2	No	No	No	No	42	Included		Unsupervised
Smithuis-2006	Myanmar	DP	Artekin	Holleykin Pharmaceuticals	Full	2003	2004	156	0	0	No	No	No	No	42	Included		Supervised
Smithuis-2010	Cambodia	DP	Duo-cotecxin	Holley Pharm	Partial	2008	2009	78	0	1	Yes	Yes	Yes	No	63	Included
Smithuis-2010	Cambodia	DP Plus Primaquine	Duo-cotecxin	Holley Pharm	Partial	2008	2009	83	0	0	Yes	Yes	Yes	No	63	Included
Song-2011	Cambodia	DP	Artekin	Holleykin Pharmaceutical Co., Ltd	Full	2005	2005	55	0	1	No	Yes	Yes	No	28	Not Targeted	2-day regimen
Sutanto-2012a	Indonesia	DP	D-ARTEPP	Guilin Pharmaceutical Co, Ltd	Full	2008	2010	188	0	0	No	Yes	Yes	No	42	Not Available
Sutanto-2012a	Indonesia	DP Plus Primaquine	D-ARTEPP	Guilin Pharmaceutical Co, Ltd	Full	2008	2010	186	0	0	No	Yes	Yes	No	42	Not Available
Sutanto-2012b	Indonesia	DP Plus Primaquine	Eurartesim	Sigma Tau	Full	2010	2011	0	36	Pv Only Study	No	No	Yes	No	365	Not Targeted	Vivax patients only
Tangpukdee-2005	Thailand	DP	Artekin	Holleykin Pharmaceutical Co Ltd	Not stated			120	0	No PCR Results	No	Yes	Yes	No	28	Not Targeted	no PCR results
Thanh-2009	Vietnam	DP	Arterakine	Central Pharmaceutical Factory No. 1	Full	2006	2007	60	0	0	No	No	No	No	42	Not Available
Tjitra-2012	Indonesia	DP	Duo-cotecxin	Holley-Cotec Pharmaceutical Co.LTd	Full	2007	2008	122	78	4	No	No	Yes	No	42	Not Available
Tran-2004	Vietnam	DP	Artekin	Tonghe Pharmaceutical	Full	2001	2001	166	0	2	No	Yes	Yes	No	56	Not Available		4-dose regimen over 3 days
Tran-2004	Vietnam	DP Plus Trimethoprim	Artecom	Tonghe Pharmaceutical	Full	2001	2001	157	0	4	No	Yes	Yes	No	56	Not Available		4-dose regimen over 3 days
Tran-2012	Vietnam	DP	Artecan	OPC	Full	2010	2011	55	0	3	No	Yes	Yes	No	42	Included
Trung-2009	Vietnam	DP	Artekin	Guangzhou Holleykin Pharmaceutical Co., Ltd.	Full			51	0	0	No	Yes	Yes	No	28	Not Targeted	2-day regimen
Valecha-2010	Multicentred	DP	Eurartesim	Sigma Tau	Full	2005	2007	769	0	11	Yes	Yes	Yes	No	63	Included		Only 767 patient data submitted
Whegang-2010	Cameroon	DP	Duo-cotecxin	Holley Pharm	Full	2003	2007	91	0	2	Yes	No	No	No	28	Not Available
Wilairatana-2002	Thailand	DP Plus Trimethoprim	Artecom	Tonghe Pharmaceutical Co, Ltd	Not stated			234	0	No PCR Results	No	Yes	Yes	No	28	Not Targeted	2-day regimen, no PCR results
Yavo-2011	Multicentred	DP	Duo-cotecxin	Holley-Cotec Pharmaceutical Co. Ltd	Full	2006	2008	197	0	0	Yes	Yes	Yes	No	28	Included
Yeka_2013	Uganda	DP	Eurartesim	Sigma Tau	Full	2007	2009	72	0	3	Yes	No	No	No	28	Excluded	Retreatment study
Yeka-2008	Uganda	DP	Duo-cotecxin	Holley Pharm	Full	2006	2007	215	0	4	yes	No	No	No	42	Included
Zongo-2007	Burkina Faso	DP	Duo-cotecxin	Holleypharm	Full	2006	2006	187	0	2	Yes	No	No	No	42	Included

## Sheet: Dosing Schedule
Reference	Formulation	Adults Tablet Contents	Paediatric Tablet Contents	Calculation of Total Doses	Dosing Schedule	Schedule	Total target dose of DHA over 3 days (mg/kg)	Total target dose of PIP over 3 days (mg/kg)	Comments
4ABC Study Group-2011	Eurartesim	40 mg DHA / 320 mg of PIP	20 mg DHA / 160 mg of PIP	Extrapolated from Dosing Schedule	5-<7 kg: 1/2 paed. tablet; 7-<13 kg: 1 paed. tablet; 13-<24 kg: 1 tablet; 24-<35 kg : 2 tablets	Once Daily for 3 days	6.75	54
Adam-2010	Duo-cotecxin	40 mg DHA / 320 mg of PIP	20 mg DHA / 160 mg of PIP	Extrapolated from Dosing Schedule	5-9 kg: 1/2 paed. tablet; 10-19.9 kg: 1 paed.tablet; 20-40 kg: 2 paed. tablets; ≥ 40 kg: 3 tablets	Once Daily for 3 days	7.2	60
Arinaitwe-2009	Duo-cotecxin	40 mg DHA / 320 mg of PIP		Extrapolated from Dosing Schedule	< 6 kg : 1/4 tablet; 6-<11 kg: 1/2 tablet; 11-<15 kg : 3/4 tablets; 15-<20 kg: 1 tablet; 20-<24 kg : 1.25 tablets	Once Daily for 3 days	6.4	51.2
Ashley-2004	Artekin	40 mg DHA / 320 mg of PIP		From exact tablet administered	5-10 kg: 1 to 2 mls of a suspension of 1 tab in 5 ml (0.2 ml increase/kg); 11-18 kg: 1/2 tablet; 19-25 kg: 1 tablet; 26-34 kg: 1.5 tablets; 35-65 kg: 2 tablets; 66-74 kg: 2.5 tablets; 75-100 kg: 3 tablets	Four doses over 3 days	6	48
Ashley-2004	Artekin	40 mg DHA / 320 mg of PIP		From exact tablet administered	5-10 kg: 1 to 2 mls of a suspension of 1 tab in 5 ml (0.2 ml increase/kg); 11-18 kg: 1/2 tablet; 19-25 kg: 1 tablet; 26-34 kg: 1.5 tablets; 35-65 kg: 2 tablets; 66-74 kg: 2.5 tablets; 75-100 kg: 3 tablets	Four doses over 3 days	12	51.2	Extra tablet of artesunate or DHA
Ashley-2004	Artekin	40 mg DHA / 320 mg of PIP		From exact tablet administered	5-10 kg: 1 to 2 mls of a suspension of 1 tab in 5 ml (0.2 ml increase/kg); 11-18 kg: 1/2 tablet; 19-25 kg: 1 tablet; 26-34 kg: 1.5 tablets; 35-65 kg: 2 tablets; 66-74 kg: 2.5 tablets; 75-100 kg: 3 tablets	Four doses over 3 days	6.4	51.2
Ashley-2005	Artekin	40 mg DHA / 320 mg of PIP		From exact tablet administered	5-10 kg: 1 to 2 mls of a suspension of 1 tab in 5 ml (0.2 ml increase/kg); 11-18 kg: 1/2 tablet; 19-25 kg: 1 tablet; 26-34 kg: 1.5 tablets; 35-65 kg: 2 tablets; 66-74 kg: 2.5 tablets; 75-100 kg: 3 tablets	Four doses over 3 days	6.4	51.2
Ashley-2005	Artekin	40 mg DHA / 320 mg of PIP		From exact tablet administered	5-7 kg: 1.3 to 2 mls of a supension of 1 tab in 5 ml (0.3 m increase/kg); 8-12 kg: 1/2 tablet; 13-20 kg: 1 tablet; 21-30 kg: 1.5 tablets; 31-40 kg: 2 tablets; 41-50: 2.5 tablets; 51-60 kg: 3 tablets; 61-70 kg: 3.5 tablets; 71-80 kg: 4 tablets; 85-100 kg: 5 tablets	Once Daily for 3 days	6.4	51.2
Awab-Unpublished	Duo-cotecxin	40 mg DHA / 320 mg of PIP		From exact tablet administered	5-10 kg: 1/2 tablet; 11-15 kg: 3/4 tablet; 16-20 kg: 1 tablet; 21-30 kg: 1.5 tablets; 31-40 kg: 2 tablets; >40 kg: 3 tablets	Once Daily for 3 days	6	48
Bassat-2009	Eurartesim	40 mg DHA / 320 mg of PIP	20 mg DHA / 160 mg of PIP	Extrapolated from Dosing Schedule	4-<7 kg: 1/2 Paed. tablet; 7-<13 kg: 1 Paed. tablet; 13-<24 kg: 1 tablet; 24-<36 kg : 2 tablets; 36-<76: 3 tablets	Once Daily for 3 days	6.75	54
Borrmann-2011	Eurartesim	40 mg DHA / 320 mg of PIP	20 mg DHA / 160 mg of PIP	From exact tablet administered	4-<7 kg: 1/2 Paed. tablet; 7-<13 kg: 1 Paed. tablet; 13-<24 kg: 1 tablet; 24-<36 kg : 2 tablets; 36-<76: 3 tablets	Once Daily for 3 days	6.75	54
Gaye-Unpublished	Duo-cotecxin	40 mg DHA / 320 mg of PIP		Extrapolated from Dosing Schedule	6-<11 years: 1.5 tablet (day 0, day 1) and 1 tablet (day 2); 11-<16 years: 2 tablets/day; >=16 years: 3 tablets (day 0, day 1) and 2 tablets (day 3)	Once Daily for 3 days	Not Stated	Not Stated
Grande-2007	Artekin	40 mg DHA / 320 mg of PIP		Extrapolated from Dosing Schedule	13-<21 kg: 1 tablet; 21-<31 kg: 1.5 tablets; 31-<41 kg: 2 tablets; 41-<51 kg: 2.5 tablets; 51-<61 kg: 3 tablets; 61-<71 kg: 3.5 tablets; 71-<85 kg: 4 tablets; ≥85 kg : 5 tablets	Once Daily for 3 days	6.3	50.4
Hasugian-2007	Artekin	40 mg DHA / 320 mg of PIP		Extrapolated from Dosing Schedule	10-<13 kg: 1/2 tablet; 13-<21 kg: 1 tablet; 21-<31 kg: 1.5 tablets; 31-<41 kg: 2 tablets; 41-<51 kg: 2.5 tablets; 51-<61 kg: 3 tablets; 61-<71 kg: 3.5 tablets; 71-<85 kg: 4 tablets; 85-<=100 kg: 5 tablets	Once Daily for 3 days	6.75	54
Janssens-2007	Artekin	40 mg DHA / 320 mg of PIP		Extrapolated from Dosing Schedule	5-<25 kg [suspension dosing 1 ml for 5 kg patient, with every unit increase in weight given additional 0.2 ml]; 25-<26 kg: 1 tablet; 26-<35 kg: 1.5 tablets; 35-<66 kg: 2 tablets; 66-<75 kg: 2.5 tablets; 75-<100 kg: 3 tablets	Four doses over 3 days	6.0-6.4	48.0-51.2
Kamya-2007	Duo-cotecxin	40 mg DHA / 320 mg of PIP		Extrapolated from Dosing Schedule	5-<6 kg: 1/4 tablet; 6-<11 kg: 1/2 tablet; 11-<15 kg: 3/4 tablet : 15-<20 kg: 1 tablet; 20-<29 kg: 1.5 tablets; 29-<34 tablets: 1.75 tablets: 34-<=40: 2 tablets	Once Daily for 3 days	6.4	51.2
Karema-2006	Artekin	40 mg DHA / 320 mg of PIP		Extrapolated from Dosing Schedule	10-<13 kg: 1/2 tablet; 13-<21 kg: 1 tablet; 21-<31 kg: 1.5 tablets	Once Daily for 3 days	4.8-9.3	38.4-73.8
Karunajeewa-2008a	Duo-cotecxin	40 mg DHA / 320 mg of PIP		From exact tablet administered	6-9.9 kg: 1/2 tablet; 10-14.9 kg: 3/4 tablet; 15-18.9kg: 1 tablet; 19-27.9: 1.5 tablets; 28-36.9: 2 tablets; 37-49.9: 3 tablets	Once Daily for 3 days	7.5	60
Mayxay-2006	Artekin	40 mg DHA / 320 mg of PIP		From exact tablet administered	7-<13 kg: 1/2 tablet; 13-<21 kg: 1 tablet; 21-30 kg: 1.5 tablets; >30 -40 kg: 2 tablets; >40 - 50 kg: 2.5 tablets; > 50 -70 kg: 3tablets; > 70kg: 4 tablets	Once Daily for 3 days	6.3	50.4
Mens-2008	Eurartesim		20 mg DHA / 160 mg of PIP	Extrapolated from Dosing Schedule	4–<7 kg: 1/2 paed. tablet; 7–<13 kg: 1 paed.tablet; 13–<24 kg: 2 paed. tablets; 24–3<=5 kg: 4 paed.tablets	Once Daily for 3 days	6.75	54
Ratcliff-2007	Artekin	40 mg DHA / 320 mg of PIP		Extrapolated from Dosing Schedule	10-<13 kg: 1/2 tablet; 13-<21 kg: 1 tablet; 21-<31 kg: 1.5 tablets; 31-<41 kg: 2 tablets; 41-<51 kg: 2.5 tablets; 51-<61 kg: 3 tablets; 61-<71 kg: 3.5 tablets; 71-<85 kg: 4 tablets; 85-<=100 kg: 5 tablets	Once Daily for 3 days	6.75	54
Sawa-2013	Duo-cotecxin	40 mg DHA / 320 mg of PIP		From exact tablet administered	8-10 kg: 1/2 tablet; 11-20 kg: 1 tablet; 21-30 kg: 1.5 tablets; 31-40 kg: 2 tablets	Once Daily for 3 days	6.4	51.2
Smithuis-2006	Artekin	40 mg DHA / 320 mg of PIP	20 mg DHA / 160 mg of PIP	Extrapolated from Dosing Schedule	< 6 years: 5-<7 kg: 1/2 paed. tablet; 7-<10 kg: 1 paed. tablet; 10-<15 kg: 2 paed. tablets (day 0) , 1 paed. tablet (day 1, day 2); 15-<20 kg: 2 tablets. ≥ 6 years: 6-<11 years : 1.5 tablet (day 0,day 1), 1 tablet (day2) ; 11-<16 years: 2 tablets; ≥ 16 years: 3 tablets	Once Daily for 3 days	6.3	50.4
Smithuis-2006	Artekin	40 mg DHA / 320 mg of PIP		Extrapolated from Dosing Schedule	< 6 years: 5-<7 kg: 1/2 paed. tablet; 7-<10 kg: 1 paed. tablet; 10-<15 kg: 2 paed. tablets (day 0) , 1 paed. tablet (day 1, day 2); 15-<20 kg: 2 tablets. ≥ 6 years: 6-<11 years : 1.5 tablet (day 0,day 1), 1 tablet (day2) ; 11-<16 years: 2 tablets; ≥ 16 years: 3 tablets	Once Daily for 3 days	6.3	50.4
Smithuis-2010	Duo-cotecxin	40 mg DHA / 320 mg of PIP	20 mg DHA / 160 mg of PIP	Extrapolated from Dosing Schedule	< 6 years: 5-<7 kg: 1/2 paed. tablet; 7-<10 kg: 1 paed. tablet; 10-<15 kg: 2 paed. tablets (day 0) , 1 paed. tablet (day 1, day 2); 15-<20 kg: 2 tablets. ≥ 6 years: 6-<11 years : 1.5 tablet (day 0,day 1), 1 tablet (day2) ; 11-<16 years: 2 tablets; ≥ 16 years: 3 tablets	Once Daily for 3 days	7.5	60
Smithuis-2010	Duo-cotecxin	40 mg DHA / 320 mg of PIP	20 mg DHA / 160 mg of PIP	Extrapolated from Dosing Schedule	< 6 years: 5-<7 kg: 1/2 paed. tablet; 7-<10 kg: 1 paed. tablet; 10-<15 kg: 2 paed. tablets (day 0) , 1 paed. tablet (day 1, day 2); 15-<20 kg: 2 tablets. ≥ 6 years: 6-<11 years : 1.5 tablet (day 0,day 1), 1 tablet (day2) ; 11-<16 years: 2 tablets; ≥ 16 years: 3 tablets	Once Daily for 3 days	7.5	60
Tran-2012	Artecan	40 mg DHA / 320 mg of PIP		From exact tablet administered	< 15kg: 1 tablet; 15-24 kg: 1.5 tablets; 25-34 kg: 2 tablets; >35 kg: 3 tablets	Once Daily for 3 days	7.2	57.6
Valecha-2010	Eurartesim	40 mg DHA / 320 mg of PIP	20 mg DHA / 160 mg of PIP	Extrapolated from Dosing Schedule	4-<7 kg: 1/2 paed. tablet; 7-<13 kg: 1 paed. tablet; 13-<24 kg: 1 tablet; 24-<36 kg : 2 tablets; 36-<76: 3 tablets	Once Daily for 3 days	6.75	54
Yavo-2011	Duo-cotecxin	40 mg DHA / 320 mg of PIP		Extrapolated from Dosing Schedule	5-9 kg: 1/2 tablet; 10-14 kg: 3/4 tablet; 15-19 kg: 1 tablet; 20-24 kg: 1 + 1/4 tablets; 25-29 kg: 1 + 1/2 tablets; 30-34 kg: 1 + 3/4 tablets, 35-39 kg: 2 tablets; 40-44 kg: 2 + 1/4 tablets, 45-49 kg: 2 + 1/2 tablets; ≥ 50 kg: 3 tablets	Once Daily for 3 days	6.8	54
Yeka-2008	Duo-cotecxin	40 mg DHA / 320 mg of PIP		Extrapolated from Dosing Schedule	5-<6 kg: 1/4 tablet; 6-<11 kg: 1/2 tablet; 11-<15 kg: 3/4 tablet : 15-<20 kg: 1 tablet; 20-<24 kg : 1.25 tablets; 24-<29 kg: 1.5 tablets; 29-<34 tablets: 1.75 tablets: 34-40: 2 tablets	Once Daily for 3 days	6.4	51.2
Zongo-2007	Duo-cotecxin	40 mg DHA / 320 mg of PIP		Extrapolated from Dosing Schedule	5-<6 kg: 1/4 tablet; 6-<11 kg: 1/2 tablet; 11-<15 kg: 3/4 tablet : 15-<20 kg: 1 tablet; 20-<24 kg : 1.25 tablets; 24-<29 kg: 1.5 tablets; 29-<34 tablets: 1.75 tablets: 34-40: 2 tablets	Once Daily for 3 days	6.4	51.2
